# Supplementary material for: Theoretical investigation of the effects of N-substitution on the photophysical properties of two series of iridium(iii) complexes
Source: Royal Society of Chemistry journal article supplement (doi:10.1039/c4nj02236j), 2015-01-01
Supplement: c4nj02236j1.pdf [file c4nj02236j1.pdf]

Supporting Information

New Journal of Chemistry

For

**Theoretical investigation on the effects of N-substitution on the photophysical properties of two series of iridium(III) complexes**

Xiaohong Shang,<sup>\*a</sup> Deming Han,<sup>b</sup> Qing Zhan,<sup>c</sup> Defeng Zhou,<sup>a</sup> and Gang Zhang<sup>d</sup>

<sup>a</sup> *College of Chemistry and Life Science, Changchun University of Technology, Changchun 130012, P. R. China*

*E-mail: shangxiaohong58@aliyun.com*

<sup>b</sup> *School of Life Science and Technology, Changchun University of Science and Technology, Changchun 130022, P. R. China*

<sup>c</sup> *Jilin Provincial Institute of Education, Changchun 130022, P.R. China*

<sup>d</sup> *State Key Laboratory of Theoretical and Computational Chemistry, Institute of Theoretical Chemistry, Jilin University, Changchun 130023, P. R. China*

**Fig. S1** Calculated bond length variations of complexes 1 and 2 compared with experimental results.

**Fig. S2** Calculated bond length variations between the lowest singlet state and the lowest triplet state for complexes 1-1d and 2-2d (The negative values represent the bond distances that are contracted in the lowest triplet state, while the positive ones indicate an elongation for the bonds in the  $T_1$  state).

**Table S1** The calculated geometry parameters obtained by different computational methods together with the experimental results of complexes 1 and 2

**Table S2** Frontier molecular orbital energies (eV), compositions (%), and assignment in the ground state for complex 1

**Table S3** Frontier molecular orbital energies (eV), compositions (%), and assignment in the ground state for complex 1a

**Table S4** Frontier molecular orbital energies (eV), compositions (%), and assignment in the ground state for complex 1b

**Table S5** Frontier molecular orbital energies (eV), compositions (%), and assignment in the ground state for complex 1c

**Table S6** Frontier molecular orbital energies (eV), compositions (%), and assignment in the ground state for complex 1d

**Table S7** Frontier molecular orbital energies (eV), compositions (%), and assignment in the ground state for complex 2

**Table S8** Frontier molecular orbital energies (eV), compositions (%), and assignment in the ground state for complex 2a

**Table S9** Frontier molecular orbital energies (eV), compositions (%), and assignment in the ground state for complex 2b

**Table S10** Frontier molecular orbital energies (eV), compositions (%), and assignment in the ground state for complex 2c

**Table S11** Frontier molecular orbital energies (eV), compositions (%), and assignment in the ground state for complex 2d

**Table S12** Selected calculated wavelength (nm)/energies (eV), oscillator strength ( $f$ ), major contribution, transition characters, and the available experimental wavelength (nm) for these studied complexes in CH<sub>2</sub>Cl<sub>2</sub> media at TDDFT/PBE0/LANL2DZ+6-31G(d) level

**Table S13** Calculated phosphorescent emission wavelength (nm)/energies (eV), of the complexes 1 and 2 in CH<sub>2</sub>Cl<sub>2</sub> media with the TDDFT method at the M062X, M052X, B3LYP and PBE0 level, respectively, together with the experimental values

**Table S14** Partial molecular orbital composition (%) of 1-1d and 2-2d in the excited states

**Table S15** Cartesian coordinates from the optimized structures of S<sub>0</sub> at PBE0 (B3LYP) /6-31G(d) level for 1

**Table S16** Cartesian coordinates from the optimized structures of S<sub>0</sub> at PBE0 (B3LYP) /6-31G(d) level for 2

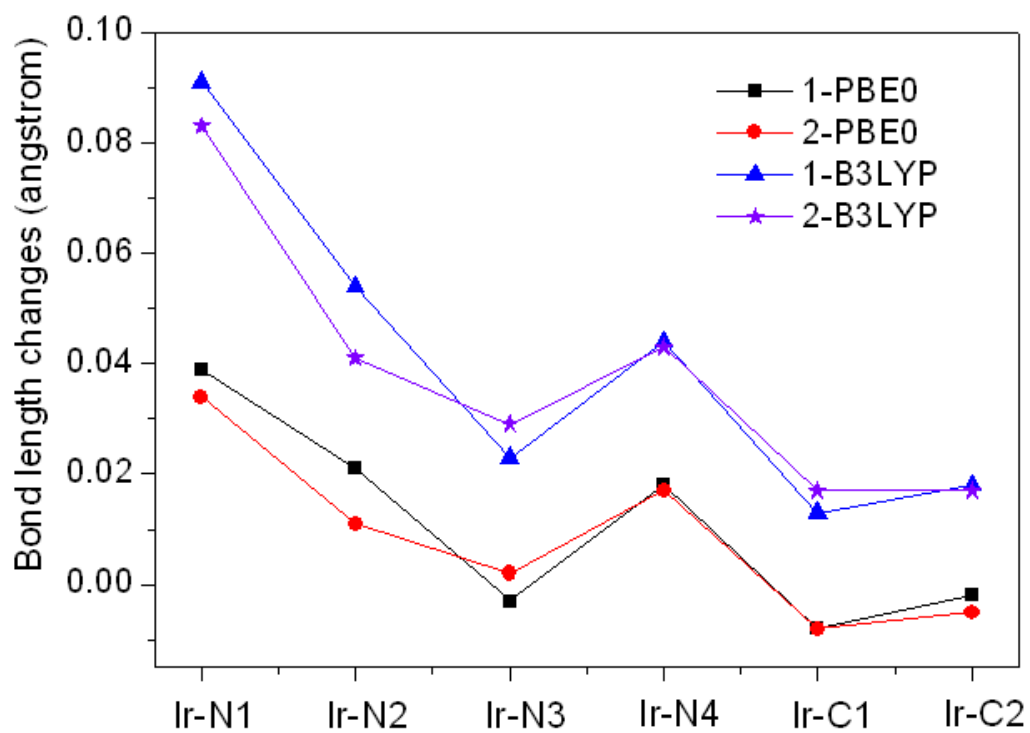

**Fig. S1** Calculated bond length variations of complexes 1 and 2 compared with experimental results.

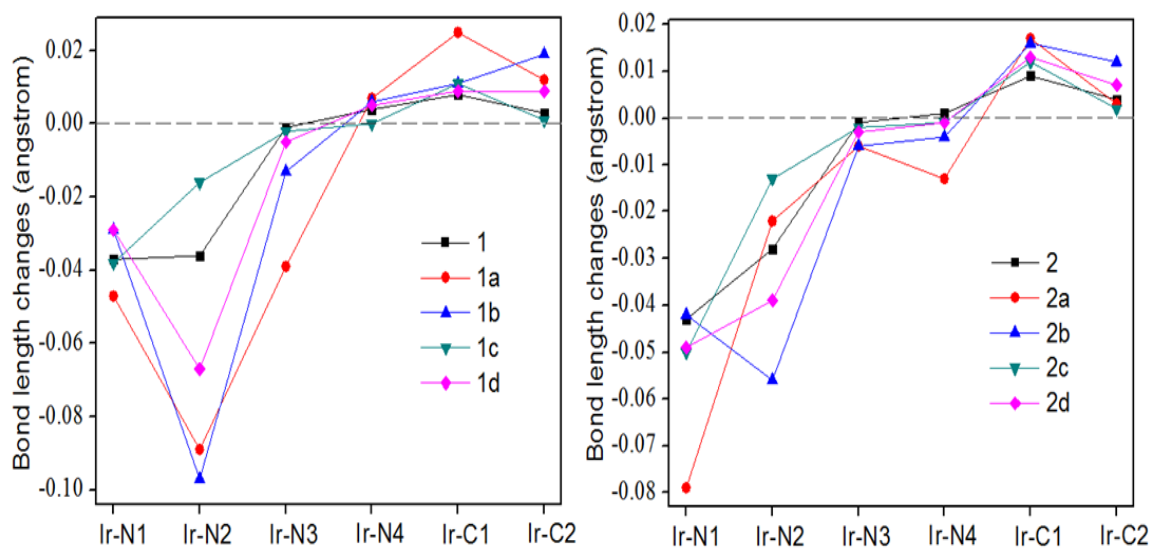

**Fig. S2** Calculated bond length variations between the lowest singlet state and the lowest triplet state for complexes 1-1d and 2-2d (The negative values represent the bond distances that are contracted in the lowest triplet state, while the positive ones indicate an elongation for the bonds in the  $T_1$  state).

**Table S1** The calculated geometry parameters obtained by different computational methods together with the experimental results of complexes 1 and 2

|                 | B3LYP |       | PBE0  |       | Exptl. <sup>a</sup> |       |
|-----------------|-------|-------|-------|-------|---------------------|-------|
|                 | 1     | 2     | 1     | 2     | 1                   | 2     |
| bond length (Å) |       |       |       |       |                     |       |
| Ir-N1           | 2.271 | 2.256 | 2.219 | 2.207 | 2.180               | 2.173 |
| Ir-N2           | 2.169 | 2.130 | 2.136 | 2.100 | 2.115               | 2.089 |
| Ir-N3           | 2.072 | 2.070 | 2.046 | 2.044 | 2.028               | 2.027 |
| Ir-N4           | 2.062 | 2.071 | 2.036 | 2.044 | 2.039               | 2.042 |
| Ir-C1           | 2.042 | 2.061 | 2.022 | 2.039 | 2.024               | 2.044 |
| Ir-C2           | 2.052 | 2.081 | 2.031 | 2.056 | 2.039               | 2.064 |
| bond angle (°)  |       |       |       |       |                     |       |
| N1-Ir-N2        | 75.0  | 75.7  | 75.8  | 76.4  | 76.1                | 76.5  |
| C1-Ir-N3        | 88.7  | 86.0  | 88.7  | 86.0  | 90.2                | 86.7  |
| C2-Ir-N3        | 92.5  | 94.8  | 92.1  | 94.6  | 89.3                | 95.9  |

<sup>a</sup> Reference 19

**Table S2** Frontier molecular orbital energies (eV), compositions (%), and assignment in the ground state for complex 1

| MO                   | Energy | Contribution(%) |                  |                  | Assignment                                          |
|----------------------|--------|-----------------|------------------|------------------|-----------------------------------------------------|
|                      |        | Ir              | C <sup>^</sup> N | N <sup>^</sup> N |                                                     |
| L+8                  | 0.90   | 30              | 32               | 38               | d(Ir)+ $\pi^*$ (C <sup>^</sup> N+ N <sup>^</sup> N) |
| L+7                  | 0.63   | 8               | 91               | 1                | $\pi^*$ (C <sup>^</sup> N)                          |
| L+6                  | 0.47   | 10              | 88               | 2                | $\pi^*$ (C <sup>^</sup> N)                          |
| L+5                  | 0.23   | 4               | 95               | 1                | $\pi^*$ (C <sup>^</sup> N)                          |
| L+4                  | 0.04   | 8               | 90               | 2                | $\pi^*$ (C <sup>^</sup> N)                          |
| L+3                  | -0.06  | 6               | 92               | 2                | $\pi^*$ (C <sup>^</sup> N)                          |
| L+2                  | -0.44  | 5               | 92               | 3                | $\pi^*$ (C <sup>^</sup> N)                          |
| L+1                  | -1.22  | 0               | 3                | 97               | $\pi^*$ (N <sup>^</sup> N)                          |
| L                    | -1.76  | 2               | 2                | 96               | $\pi^*$ (N <sup>^</sup> N)                          |
| Energy gap = 4.24 eV |        |                 |                  |                  |                                                     |
| H                    | -6.00  | 36              | 62               | 2                | d(Ir)+ $\pi$ (C <sup>^</sup> N)                     |
| H-1                  | -6.18  | 44              | 41               | 15               | d(Ir)+ $\pi$ (C <sup>^</sup> N)                     |
| H-2                  | -6.38  | 2               | 97               | 1                | $\pi$ (C <sup>^</sup> N)                            |
| H-3                  | -6.59  | 27              | 21               | 52               | d(Ir)+ $\pi$ (C <sup>^</sup> N + N <sup>^</sup> N)  |
| H-4                  | -6.70  | 6               | 90               | 4                | $\pi$ (C <sup>^</sup> N)                            |
| H-5                  | -6.87  | 12              | 86               | 2                | $\pi$ (C <sup>^</sup> N)                            |
| H-6                  | -7.16  | 39              | 14               | 47               | d(Ir)+ $\pi$ (N <sup>^</sup> N)                     |
| H-7                  | -7.61  | 3               | 46               | 51               | $\pi$ (C <sup>^</sup> N + N <sup>^</sup> N)         |
| H-8                  | -7.74  | 6               | 81               | 13               | $\pi$ (C <sup>^</sup> N)                            |

H = HOMO; L= LUMO

**Table S3** Frontier molecular orbital energies (eV), compositions (%), and assignment in the ground state for complex 1a

| MO                   | Energy | Contribution(%) |                  |                  | Assignment                              |
|----------------------|--------|-----------------|------------------|------------------|-----------------------------------------|
|                      |        | Ir              | C <sup>^</sup> N | N <sup>^</sup> N |                                         |
| L+8                  | 0.84   | 9               | 9                | 82               | $\pi^*(N^{\wedge}N)$                    |
| L+7                  | 0.67   | 8               | 92               | 1                | $\pi^*(C^{\wedge}N)$                    |
| L+6                  | 0.56   | 11              | 88               | 1                | $\pi^*(C^{\wedge}N)$                    |
| L+5                  | 0.38   | 4               | 96               | 0                | $\pi^*(C^{\wedge}N)$                    |
| L+4                  | 0.23   | 11              | 84               | 4                | $\pi^*(C^{\wedge}N)$                    |
| L+3                  | 0.00   | 5               | 94               | 2                | $\pi^*(C^{\wedge}N)$                    |
| L+2                  | -0.39  | 5               | 94               | 1                | $\pi^*(C^{\wedge}N)$                    |
| L+1                  | -1.82  | 0               | 0                | 99               | $\pi^*(N^{\wedge}N)$                    |
| L                    | -2.28  | 3               | 2                | 95               | $\pi^*(N^{\wedge}N)$                    |
| Energy gap = 3.73 eV |        |                 |                  |                  |                                         |
| H                    | -6.01  | 35              | 63               | 2                | d(Ir)+ $\pi(C^{\wedge}N)$               |
| H-1                  | -6.14  | 39              | 53               | 9                | d(Ir)+ $\pi(C^{\wedge}N)$               |
| H-2                  | -6.34  | 3               | 97               | 1                | $\pi(C^{\wedge}N)$                      |
| H-3                  | -6.51  | 2               | 97               | 1                | $\pi(C^{\wedge}N)$                      |
| H-4                  | -6.67  | 32              | 31               | 36               | d(Ir)+ $\pi(C^{\wedge}N + N^{\wedge}N)$ |
| H-5                  | -6.78  | 25              | 65               | 10               | d(Ir)+ $\pi(C^{\wedge}N)$               |
| H-6                  | -7.35  | 26              | 18               | 56               | d(Ir)+ $\pi(C^{\wedge}N + N^{\wedge}N)$ |
| H-7                  | -7.60  | 4               | 62               | 34               | $\pi(C^{\wedge}N + N^{\wedge}N)$        |
| H-8                  | -7.70  | 6               | 80               | 14               | $\pi(C^{\wedge}N)$                      |



**Table S4** Frontier molecular orbital energies (eV), compositions (%), and assignment in the ground state for complex 1b

| MO                   | Energy | Contribution(%) |                  |                  | Assignment                              |
|----------------------|--------|-----------------|------------------|------------------|-----------------------------------------|
|                      |        | Ir              | C <sup>^</sup> N | N <sup>^</sup> N |                                         |
| L+8                  | 0.73   | 15              | 14               | 71               | $\pi^*(N^{\wedge}N)$                    |
| L+7                  | 0.53   | 8               | 91               | 1                | $\pi^*(C^{\wedge}N)$                    |
| L+6                  | 0.37   | 11              | 89               | 1                | $\pi^*(C^{\wedge}N)$                    |
| L+5                  | 0.15   | 4               | 95               | 1                | $\pi^*(C^{\wedge}N)$                    |
| L+4                  | -0.04  | 9               | 88               | 3                | $\pi^*(C^{\wedge}N)$                    |
| L+3                  | -0.17  | 6               | 92               | 2                | $\pi^*(C^{\wedge}N)$                    |
| L+2                  | -0.55  | 5               | 92               | 2                | $\pi^*(C^{\wedge}N)$                    |
| L+1                  | -1.52  | 1               | 3                | 96               | $\pi^*(N^{\wedge}N)$                    |
| L                    | -2.16  | 2               | 1                | 97               | $\pi^*(N^{\wedge}N)$                    |
| Energy gap = 3.96 eV |        |                 |                  |                  |                                         |
| H                    | -6.12  | 36              | 62               | 2                | d(Ir)+ $\pi(C^{\wedge}N)$               |
| H-1                  | -6.31  | 42              | 48               | 10               | d(Ir)+ $\pi(C^{\wedge}N)$               |
| H-2                  | -6.49  | 2               | 97               | 1                | $\pi(C^{\wedge}N)$                      |
| H-3                  | -6.75  | 5               | 91               | 4                | $\pi(C^{\wedge}N)$                      |
| H-4                  | -6.85  | 32              | 32               | 36               | d(Ir)+ $\pi(C^{\wedge}N + N^{\wedge}N)$ |
| H-5                  | -6.98  | 20              | 74               | 6                | d(Ir)+ $\pi(C^{\wedge}N)$               |
| H-6                  | -7.42  | 26              | 16               | 58               | d(Ir)+ $\pi(C^{\wedge}N + N^{\wedge}N)$ |
| H-7                  | -7.76  | 3               | 56               | 42               | $\pi(C^{\wedge}N + N^{\wedge}N)$        |
| H-8                  | -7.86  | 5               | 89               | 6                | $\pi(C^{\wedge}N)$                      |

**Table S5** Frontier molecular orbital energies (eV), compositions (%), and assignment in the ground state for complex 1c

| MO                   | Energy | Contribution(%) |                  |                  | Assignment                                |
|----------------------|--------|-----------------|------------------|------------------|-------------------------------------------|
|                      |        | Ir              | C <sup>^</sup> N | N <sup>^</sup> N |                                           |
| L+8                  | 0.73   | 32              | 34               | 34               | d(Ir)+ $\pi^*(C^{\wedge}N + N^{\wedge}N)$ |
| L+7                  | 0.49   | 9               | 91               | 1                | $\pi^*(C^{\wedge}N)$                      |
| L+6                  | 0.33   | 11              | 88               | 1                | $\pi^*(C^{\wedge}N)$                      |
| L+5                  | 0.09   | 4               | 95               | 1                | $\pi^*(C^{\wedge}N)$                      |
| L+4                  | -0.10  | 8               | 89               | 3                | $\pi^*(C^{\wedge}N)$                      |
| L+3                  | -0.21  | 6               | 92               | 2                | $\pi^*(C^{\wedge}N)$                      |
| L+2                  | -0.59  | 6               | 93               | 2                | $\pi^*(C^{\wedge}N)$                      |
| L+1                  | -1.51  | 0               | 3                | 97               | $\pi^*(N^{\wedge}N)$                      |
| L                    | -2.33  | 3               | 2                | 95               | $\pi^*(N^{\wedge}N)$                      |
| Energy gap = 3.84 eV |        |                 |                  |                  |                                           |
| H                    | -6.17  | 35              | 63               | 2                | d(Ir)+ $\pi(C^{\wedge}N)$                 |
| H-1                  | -6.37  | 42              | 44               | 14               | d(Ir)+ $\pi(C^{\wedge}N)$                 |
| H-2                  | -6.52  | 3               | 96               | 1                | $\pi(C^{\wedge}N)$                        |
| H-3                  | -6.78  | 21              | 36               | 43               | d(Ir)+ $\pi(C^{\wedge}N + N^{\wedge}N)$   |
| H-4                  | -6.84  | 10              | 77               | 14               | $\pi(C^{\wedge}N)$                        |
| H-5                  | -7.02  | 14              | 84               | 3                | $\pi(C^{\wedge}N)$                        |
| H-6                  | -7.38  | 39              | 17               | 45               | d(Ir)+ $\pi(C^{\wedge}N + N^{\wedge}N)$   |
| H-7                  | -7.74  | 3               | 44               | 53               | $\pi(C^{\wedge}N + N^{\wedge}N)$          |
| H-8                  | -7.89  | 4               | 81               | 15               | $\pi(C^{\wedge}N)$                        |

**Table S6** Frontier molecular orbital energies (eV), compositions (%), and assignment in the ground state for complex 1d

| MO                  | Energy | Contribution(%) |                  |                  | Assignment                                            |
|---------------------|--------|-----------------|------------------|------------------|-------------------------------------------------------|
|                     |        | Ir              | C <sup>^</sup> N | N <sup>^</sup> N |                                                       |
| L+8                 | 0.81   | 39              | 41               | 20               | d(Ir)+ $\pi^*$ ( C <sup>^</sup> N + N <sup>^</sup> N) |
| L+7                 | 0.55   | 9               | 90               | 1                | $\pi^*$ ( C <sup>^</sup> N)                           |
| L+6                 | 0.38   | 11              | 87               | 1                | $\pi^*$ ( C <sup>^</sup> N)                           |
| L+5                 | 0.12   | 4               | 95               | 1                | $\pi^*$ ( C <sup>^</sup> N)                           |
| L+4                 | -0.07  | 8               | 90               | 3                | $\pi^*$ ( C <sup>^</sup> N)                           |
| L+3                 | -0.16  | 6               | 91               | 2                | $\pi^*$ ( C <sup>^</sup> N)                           |
| L+2                 | -0.54  | 5               | 92               | 2                | $\pi^*$ ( C <sup>^</sup> N)                           |
| L+1                 | -1.76  | 0               | 2                | 98               | $\pi^*$ ( N <sup>^</sup> N)                           |
| L                   | -2.01  | 3               | 2                | 96               | $\pi^*$ ( N <sup>^</sup> N)                           |
| Energy gap =4.09 eV |        |                 |                  |                  |                                                       |
| H                   | -6.10  | 35              | 62               | 3                | d(Ir)+ $\pi$ (C <sup>^</sup> N)                       |
| H-1                 | -6.31  | 43              | 43               | 13               | d(Ir)+ $\pi$ (C <sup>^</sup> N)                       |
| H-2                 | -6.46  | 2               | 97               | 1                | $\pi$ (C <sup>^</sup> N)                              |
| H-3                 | -6.73  | 28              | 28               | 44               | d(Ir)+ $\pi$ (C <sup>^</sup> N + N <sup>^</sup> N)    |
| H-4                 | -6.81  | 9               | 84               | 7                | $\pi$ (C <sup>^</sup> N)                              |
| H-5                 | -6.98  | 13              | 85               | 2                | $\pi$ (C <sup>^</sup> N)                              |
| H-6                 | -7.35  | 33              | 17               | 50               | d(Ir)+ $\pi$ (C <sup>^</sup> N + N <sup>^</sup> N)    |
| H-7                 | -7.66  | 3               | 21               | 76               | $\pi$ (C <sup>^</sup> N + N <sup>^</sup> N)           |
| H-8                 | -7.82  | 8               | 60               | 32               | $\pi$ (C <sup>^</sup> N + N <sup>^</sup> N)           |

**Table S7** Frontier molecular orbital energies (eV), compositions (%), and assignment in the ground state for complex 2

| MO                   | Energy | Contribution(%) |     |     | Assignment              |
|----------------------|--------|-----------------|-----|-----|-------------------------|
|                      |        | Ir              | C^N | N^N |                         |
| L+8                  | 0.77   | 44              | 50  | 6   | d(Ir)+ $\pi^*(C^N)$     |
| L+7                  | 0.14   | 6               | 92  | 1   | $\pi^*(C^N)$            |
| L+6                  | 0.05   | 5               | 95  | 0   | $\pi^*(C^N)$            |
| L+5                  | -0.12  | 1               | 99  | 0   | $\pi^*(C^N)$            |
| L+4                  | -0.25  | 4               | 95  | 1   | $\pi^*(C^N)$            |
| L+3                  | -0.45  | 6               | 92  | 3   | $\pi^*(C^N)$            |
| L+2                  | -0.68  | 3               | 96  | 1   | $\pi^*(C^N)$            |
| L+1                  | -1.10  | 1               | 1   | 98  | $\pi^*(N^N)$            |
| L                    | -1.73  | 3               | 1   | 96  | $\pi^*(N^N)$            |
| Energy gap = 4.25 eV |        |                 |     |     |                         |
| H                    | -5.98  | 39              | 56  | 5   | d(Ir)+ $\pi(C^N)$       |
| H-1                  | -6.35  | 40              | 27  | 33  | d(Ir)+ $\pi(C^N + N^N)$ |
| H-2                  | -6.68  | 38              | 38  | 24  | d(Ir)+ $\pi(C^N + N^N)$ |
| H-3                  | -6.82  | 8               | 52  | 40  | $\pi(C^N + N^N)$        |
| H-                   | -7.00  | 10              | 79  | 12  | $\pi(C^N)$              |
| H-5                  | -7.33  | 7               | 86  | 8   | $\pi(C^N)$              |
| H-6                  | -7.43  | 9               | 71  | 20  | $\pi(C^N + N^N)$        |
| H-7                  | -7.55  | 5               | 21  | 73  | $\pi(C^N + N^N)$        |
| H-8                  | -7.70  | 1               | 90  | 9   | $\pi(C^N)$              |

**Table S8** Frontier molecular orbital energies (eV), compositions (%), and assignment in the ground state for complex 2a

| MO                  | Energy | Contribution(%) |     |     | Assignment              |
|---------------------|--------|-----------------|-----|-----|-------------------------|
|                     |        | Ir              | C^N | N^N |                         |
| L+8                 | 0.81   | 45              | 50  | 5   | d(Ir)+ $\pi^*(C^N)$     |
| L+7                 | 0.15   | 6               | 93  | 1   | $\pi^*(C^N)$            |
| L+6                 | 0.08   | 4               | 95  | 0   | $\pi^*(C^N)$            |
| L+5                 | 0.01   | 5               | 95  | 1   | $\pi^*(C^N)$            |
| L+4                 | -0.07  | 3               | 97  | 1   | $\pi^*(C^N)$            |
| L+3                 | -0.41  | 4               | 94  | 2   | $\pi^*(C^N)$            |
| L+2                 | -0.47  | 4               | 95  | 1   | $\pi^*(C^N)$            |
| L+1                 | -1.74  | 0               | 1   | 99  | $\pi^*(N^N)$            |
| L                   | -2.21  | 3               | 1   | 96  | $\pi^*(N^N)$            |
| Energy gap =3.72 eV |        |                 |     |     |                         |
| H                   | -5.93  | 37              | 59  | 4   | d(Ir)+ $\pi(C^N)$       |
| H-1                 | -6.41  | 49              | 33  | 18  | d(Ir)+ $\pi(C^N + N^N)$ |
| H-2                 | -6.65  | 26              | 68  | 6   | d(Ir)+ $\pi(C^N)$       |
| H-3                 | -6.93  | 9               | 66  | 26  | $\pi(C^N + N^N)$        |
| H-4                 | -7.05  | 2               | 57  | 40  | $\pi(C^N + N^N)$        |
| H-5                 | -7.10  | 4               | 84  | 13  | $\pi(C^N)$              |
| H-6                 | -7.39  | 15              | 59  | 27  | d(Ir)+ $\pi(C^N + N^N)$ |
| H-7                 | -7.61  | 12              | 41  | 47  | d(Ir)+ $\pi(C^N + N^N)$ |
| H-8                 | -7.71  | 2               | 92  | 6   | $\pi(C^N)$              |

**Table S9** Frontier molecular orbital energies (eV), compositions (%), and assignment in the ground state for complex 2b

| MO                   | Energy | Contribution(%) |     |     | Assignment              |
|----------------------|--------|-----------------|-----|-----|-------------------------|
|                      |        | Ir              | C^N | N^N |                         |
| L+8                  | 0.64   | 44              | 51  | 5   | d(Ir)+ $\pi^*(C^N)$     |
| L+7                  | 0.02   | 7               | 92  | 1   | $\pi^*(C^N)$            |
| L+6                  | -0.06  | 5               | 95  | 0   | $\pi^*(C^N)$            |
| L+5                  | -0.21  | 2               | 98  | 1   | $\pi^*(C^N)$            |
| L+4                  | -0.32  | 4               | 95  | 1   | $\pi^*(C^N)$            |
| L+3                  | -0.56  | 6               | 92  | 2   | $\pi^*(C^N)$            |
| L+2                  | -0.74  | 3               | 96  | 1   | $\pi^*(C^N)$            |
| L+1                  | -1.39  | 1               | 1   | 98  | $\pi^*(N^N)$            |
| L                    | -2.13  | 2               | 1   | 97  | $\pi^*(N^N)$            |
| Energy gap = 3.97 eV |        |                 |     |     |                         |
| H                    | -6.10  | 38              | 58  | 4   | d(Ir)+ $\pi(C^N)$       |
| H-1                  | -6.54  | 48              | 33  | 19  | d(Ir)+ $\pi(C^N + N^N)$ |
| H-2                  | -6.83  | 34              | 55  | 12  | d(Ir)+ $\pi(C^N)$       |
| H-3                  | -7.03  | 5               | 68  | 28  | $\pi(C^N + N^N)$        |
| H-4                  | -7.18  | 4               | 54  | 42  | $\pi(C^N + N^N)$        |
| H-5                  | -7.40  | 4               | 91  | 5   | $\pi(C^N)$              |
| H-6                  | -7.56  | 13              | 60  | 27  | $\pi(C^N + N^N)$        |
| H-7                  | -7.75  | 8               | 40  | 51  | $\pi(C^N + N^N)$        |
| H-8                  | -7.83  | 3               | 83  | 14  | $\pi(C^N)$              |

**Table S10** Frontier molecular orbital energies (eV), compositions (%), and assignment in the ground state for complex 2c

| MO                  | Energy | Contribution(%) |     |     | Assignment              |
|---------------------|--------|-----------------|-----|-----|-------------------------|
|                     |        | Ir              | C^N | N^N |                         |
| L+8                 | 0.59   | 44              | 51  | 5   | d(Ir)+ $\pi^*(C^N)$     |
| L+7                 | 0.00   | 7               | 93  | 1   | $\pi^*(C^N)$            |
| L+6                 | -0.09  | 5               | 95  | 0   | $\pi^*(C^N)$            |
| L+5                 | -0.25  | 1               | 98  | 0   | $\pi^*(C^N)$            |
| L+4                 | -0.38  | 4               | 95  | 1   | $\pi^*(C^N)$            |
| L+3                 | -0.59  | 6               | 92  | 3   | $\pi^*(C^N)$            |
| L+2                 | -0.81  | 3               | 96  | 1   | $\pi^*(C^N)$            |
| L+1                 | -1.42  | 1               | 1   | 98  | $\pi^*(N^N)$            |
| L                   | -2.28  | 3               | 1   | 96  | $\pi^*(N^N)$            |
| Energy gap =3.87 eV |        |                 |     |     |                         |
| H                   | -6.15  | 38              | 58  | 5   | d(Ir)+ $\pi(C^N)$       |
| H-1                 | -6.53  | 40              | 29  | 31  | d(Ir)+ $\pi(C^N + N^N)$ |
| H-2                 | -6.88  | 35              | 46  | 19  | d(Ir)+ $\pi(C^N + N^N)$ |
| H-3                 | -6.99  | 5               | 54  | 41  | $\pi(C^N + N^N)$        |
| H-4                 | -7.15  | 10              | 75  | 15  | $\pi(C^N)$              |
| H-5                 | -7.47  | 5               | 90  | 5   | $\pi(C^N)$              |
| H-6                 | -7.56  | 8               | 58  | 34  | $\pi(C^N + N^N)$        |
| H-7                 | -7.71  | 8               | 30  | 62  | $\pi(C^N + N^N)$        |
| H-8                 | -7.84  | 1               | 88  | 11  | $\pi(C^N)$              |

**Table S11** Frontier molecular orbital energies (eV), compositions (%), and assignment in the ground state for complex 2d

| MO                  | Energy | Contribution(%) |     |     | Assignment               |
|---------------------|--------|-----------------|-----|-----|--------------------------|
|                     |        | Ir              | C^N | N^N |                          |
| L+8                 | 0.66   | 44              | 51  | 5   | d(Ir)+ $\pi^*$ ( C^N)    |
| L+7                 | 0.06   | 6               | 93  | 1   | $\pi^*$ ( C^N)           |
| L+6                 | -0.03  | 5               | 95  | 0   | $\pi^*$ ( C^N)           |
| L+5                 | -0.21  | 1               | 98  | 0   | $\pi^*$ ( C^N)           |
| L+4                 | -0.35  | 4               | 95  | 1   | $\pi^*$ ( C^N)           |
| L+3                 | -0.54  | 6               | 92  | 2   | $\pi^*$ ( C^N)           |
| L+2                 | -0.78  | 3               | 96  | 1   | $\pi^*$ ( C^N)           |
| L+1                 | -1.66  | 0               | 1   | 98  | $\pi^*$ ( N^N)           |
| L                   | -1.95  | 3               | 1   | 96  | $\pi^*$ ( N^N)           |
| Energy gap =4.14 eV |        |                 |     |     |                          |
| H                   | -6.09  | 38              | 57  | 4   | d(Ir)+ $\pi$ (C^N)       |
| H-1                 | -6.47  | 43              | 29  | 27  | d(Ir)+ $\pi$ (C^N + N^N) |
| H-2                 | -6.82  | 37              | 49  | 14  | d(Ir)+ $\pi$ (C^N)       |
| H-3                 | -6.97  | 4               | 56  | 41  | $\pi$ (C^N + N^N)        |
| H-4                 | -7.10  | 9               | 66  | 25  | $\pi$ (C^N + N^N)        |
| H-5                 | -7.44  | 8               | 84  | 9   | $\pi$ (C^N)              |
| H-6                 | -7.54  | 10              | 68  | 23  | $\pi$ (C^N + N^N)        |
| H-7                 | -7.57  | 1               | 11  | 88  | $\pi$ (N^N)              |
| H-8                 | -7.75  | 2               | 66  | 32  | $\pi$ (C^N + N^N)        |



**Table S12** Selected calculated wavelength (nm)/energies (eV), oscillator strength ( $f$ ), major contribution, transition characters, and the available experimental wavelength (nm) for these studied complexes in CH<sub>2</sub>Cl<sub>2</sub> media at TDDFT/PBE0/LANL2DZ+6-31G(d) level

|    | Stat            | $\lambda/E$ | Oscillator | Configuration | Assignment                                                                           | Nature         | Exptl. <sup>a</sup> |
|----|-----------------|-------------|------------|---------------|--------------------------------------------------------------------------------------|----------------|---------------------|
|    | e               |             |            |               |                                                                                      |                |                     |
| 1  | S <sub>1</sub>  | 357/3.46    | 0.007      | H→L(93%)      | d(Ir)+ $\pi$ (C <sup>^</sup> N)→ $\pi^*$ (N <sup>^</sup> N)                          | MLCT/LLCT      | 368                 |
|    | S <sub>2</sub>  | 339/ 3.65   | 0.079      | H-1→L(93%)    | d(Ir)+ $\pi$ (C <sup>^</sup> N)→ $\pi^*$ ( N <sup>^</sup> N)                         | MLCT/LLCT      |                     |
|    | S <sub>12</sub> | 256/ 4.82   | 0.252      | H-3→L+1(51%)  | d(Ir)+ $\pi$ (C <sup>^</sup> N+N <sup>^</sup> N)→ $\pi^*$ ( N <sup>^</sup> N)        | MLCT/LLCT/ILCT | 261                 |
|    | S <sub>13</sub> | 248/4.98    | 0.069      | H→L+3(77%)    | d(Ir)+ $\pi$ (C <sup>^</sup> N)→ $\pi^*$ ( C <sup>^</sup> N)                         | MLCT/LLCT/ILCT |                     |
|    | S <sub>60</sub> | 204/ 6.07   | 0.102      | H-1→L+8(57%)  | d(Ir)+ $\pi$ (C <sup>^</sup> N)→d(Ir)+ $\pi^*$ (C <sup>^</sup> N + N <sup>^</sup> N) | MLCT/LLCT/ILCT |                     |
|    | T <sub>1</sub>  | 395/ 3.13   | 0.000      | H-3→L(54%)    | d(Ir)+ $\pi$ (C <sup>^</sup> N+N <sup>^</sup> N)→ $\pi^*$ ( N <sup>^</sup> N)        | MLCT/LLCT/ILCT |                     |
| 1a | S <sub>1</sub>  | 395/3.13    | 0.003      | H→L(95%)      | d(Ir)+ $\pi$ (C <sup>^</sup> N)→ $\pi^*$ ( N <sup>^</sup> N)                         | MLCT/LLCT      |                     |
|    | S <sub>2</sub>  | 381/3.24    | 0.071      | H-1→L(94%)    | d(Ir)+ $\pi$ (C <sup>^</sup> N)→ $\pi^*$ ( N <sup>^</sup> N)                         | MLCT/LLCT      |                     |
|    | S <sub>19</sub> | 258/4.80    | 0.101      | H-1→L+2(52%)  | d(Ir)+ $\pi$ (C <sup>^</sup> N)→ $\pi^*$ (C <sup>^</sup> N)                          | MLCT/LLCT/ILCT |                     |
|    | S <sub>21</sub> | 248/4.98    | 0.118      | H-6→L+1(50%)  | d(Ir)+ $\pi$ (C <sup>^</sup> N+N <sup>^</sup> N)→ $\pi^*$ ( N <sup>^</sup> N)        | MLCT/LLCT/ILCT |                     |
|    | S <sub>22</sub> | 246/ 5.03   | 0.106      | H-7→L(46%)    | $\pi$ (C <sup>^</sup> N + N <sup>^</sup> N)→ $\pi^*$ ( N <sup>^</sup> N)             | LLCT/ILCT      |                     |
|    | T <sub>1</sub>  | 415/ 2.98   | 0.000      | H-1→L(88%)    | d(Ir)+ $\pi$ (C <sup>^</sup> N)→ $\pi^*$ ( N <sup>^</sup> N)                         | MLCT/LLCT      |                     |
| 1b | S <sub>1</sub>  | 383/ 3.23   | 0.003      | H→L(95%)      | d(Ir)+ $\pi$ (C <sup>^</sup> N)→ $\pi^*$ ( N <sup>^</sup> N)                         | MLCT/LLCT      |                     |
|    | S <sub>2</sub>  | 372/ 3.33   | 0.077      | H-1→L (95%)   | d(Ir)+ $\pi$ (C <sup>^</sup> N)→ $\pi^*$ ( N <sup>^</sup> N)                         | MLCT/LLCT      |                     |
|    | S <sub>11</sub> | 266/ 4.64   | 0.191      | H-6→L (46%)   | d(Ir)+ $\pi$ (C <sup>^</sup> N + N <sup>^</sup> N)→ $\pi^*$ ( N <sup>^</sup> N)      | MLCT/LLCT/ILCT |                     |
|    | S <sub>50</sub> | 212/ 5.84   | 0.096      | H-2→L+3 (45%) | $\pi$ (C <sup>^</sup> N)→ $\pi^*$ ( C <sup>^</sup> N)                                | LLCT/ILCT      |                     |
|    | T <sub>1</sub>  | 404/ 3.06   | 0.000      | H-1→L(66%)    | d(Ir)+ $\pi$ (C <sup>^</sup> N)→ $\pi^*$ ( N <sup>^</sup> N)                         | MLCT/LLCT      |                     |
| 1c | S <sub>1</sub>  | 399/ 3.10   | 0.000      | H→L(56%)      | d(Ir)+ $\pi$ (C <sup>^</sup> N)→ $\pi^*$ ( N <sup>^</sup> N)                         | MLCT/LLCT      |                     |
|    |                 |             |            | H→L+1(38%)    | d(Ir)+ $\pi$ (C <sup>^</sup> N)→ $\pi^*$ ( N <sup>^</sup> N)                         | MLCT/LLCT      |                     |
|    | S <sub>2</sub>  | 385/ 3.21   | 0.068      | H-1→L (90%)   | d(Ir)+ $\pi$ (C <sup>^</sup> N)→ $\pi^*$ ( N <sup>^</sup> N)                         | MLCT/LLCT      |                     |
|    | S <sub>10</sub> | 290/ 4.26   | 0.091      | H-6→L (81%)   | d(Ir)+ $\pi$ (C <sup>^</sup> N+N <sup>^</sup> N)→ $\pi^*$ ( N <sup>^</sup> N)        | MLCT/LLCT/ILCT |                     |
|    | S <sub>11</sub> | 270/ 4.58   | 0.134      | H-3→L+1 (46%) | d(Ir)+ $\pi$ (C <sup>^</sup> N+N <sup>^</sup> N)→ $\pi^*$ ( N <sup>^</sup> N)        | MLCT/LLCT/ILCT |                     |
|    | T <sub>1</sub>  | 430/ 2.88   | 0.000      | H-1→L(40%)    | d(Ir)+ $\pi$ (C <sup>^</sup> N)→ $\pi^*$ ( N <sup>^</sup> N)                         | MLCT/LLCT      |                     |
| 1d | S <sub>1</sub>  | 363/ 3.40   | 0.007      | H→L(94%)      | d(Ir)+ $\pi$ (C <sup>^</sup> N)→ $\pi^*$ ( N <sup>^</sup> N)                         | MLCT/LLCT      |                     |
|    | S <sub>2</sub>  | 354/ 3.50   | 0.067      | H-1→L (94%)   | d(Ir)+ $\pi$ (C <sup>^</sup> N)→ $\pi^*$ ( N <sup>^</sup> N)                         | MLCT/LLCT      |                     |
|    | S <sub>14</sub> | 263/ 4.70   | 0.124      | H-6→L (57%)   | d(Ir)+ $\pi$ (C <sup>^</sup> N+N <sup>^</sup> N)→ $\pi^*$ ( N <sup>^</sup> N)        | MLCT/LLCT/ILCT |                     |
|    | S <sub>17</sub> | 257/ 4.81   | 0.078      | H-1→L+2 (65%) | d(Ir)+ $\pi$ (C <sup>^</sup> N)→ $\pi^*$ (C <sup>^</sup> N)                          | MLCT/LLCT/ILCT |                     |
|    | S <sub>19</sub> | 248/ 4.98   | 0.106      | H→L+3 (70%)   | d(Ir)+ $\pi$ (C <sup>^</sup> N)→ $\pi^*$ ( C <sup>^</sup> N)                         | MLCT/LLCT/ILCT |                     |
|    | T <sub>1</sub>  | 398/ 3.11   | 0.000      | H-3→L(43%)    | d(Ir)+ $\pi$ (C <sup>^</sup> N+N <sup>^</sup> N)→ $\pi^*$ ( N <sup>^</sup> N)        | MLCT/LLCT/ILCT |                     |
| 2  | S <sub>1</sub>  | 360/3.44    | 0.003      | H→L(97%)      | d(Ir)+ $\pi$ (C <sup>^</sup> N)→ $\pi^*$ (N <sup>^</sup> N)                          | MLCT/LLCT      | 370                 |

|    |                 |           |       |              |                                                                  |                |     |
|----|-----------------|-----------|-------|--------------|------------------------------------------------------------------|----------------|-----|
|    | S <sub>4</sub>  | 292/ 4.24 | 0.108 | H→L+1(72%)   | d(Ir)+π(C <sup>^</sup> N)→π*(N <sup>^</sup> N)                   | MLCT/LLCT      | 284 |
|    | S <sub>17</sub> | 246/ 5.03 | 0.091 | H→L+4(51%)   | d(Ir)+π(C <sup>^</sup> N)→π*(C <sup>^</sup> N)                   | MLCT/LLCT/ILCT | 261 |
|    | S <sub>20</sub> | 239/5.16  | 0.084 | H-3→L+1(63%) | π(C <sup>^</sup> N + N <sup>^</sup> N)→π*(N <sup>^</sup> N)      | LLCT/ILCT      |     |
|    | S <sub>48</sub> | 209/5.91  | 0.085 | H-3→L+4(39%) | π(C <sup>^</sup> N + N <sup>^</sup> N)→π*(C <sup>^</sup> N)      | LLCT/ILCT      |     |
|    | T <sub>1</sub>  | 402/ 3.08 | 0.000 | H→L(49%)     | d(Ir)+π(C <sup>^</sup> N)→π*(N <sup>^</sup> N)                   | MLCT/LLCT      |     |
| 2a | S <sub>1</sub>  | 413/ 2.99 | 0.003 | H→L(98%)     | d(Ir)+π(C <sup>^</sup> N)→π*(N <sup>^</sup> N)                   | MLCT/LLCT      |     |
|    | S <sub>4</sub>  | 322/ 3.83 | 0.092 | H-2→L (89%)  | d(Ir)+ π(C <sup>^</sup> N)→π*(N <sup>^</sup> N)                  | MLCT/LLCT      |     |
|    | S <sub>15</sub> | 261/ 4.74 | 0.072 | H-3→L+1(73%) | π(C <sup>^</sup> N + N <sup>^</sup> N)→π*(N <sup>^</sup> N)      | LLCT/ILCT      |     |
|    | S <sub>28</sub> | 241/ 5.13 | 0.125 | H-6→L+1(54%) | d(Ir)+π(C <sup>^</sup> N+N <sup>^</sup> N)→π*( N <sup>^</sup> N) | MLCT/LLCT/ILCT |     |
|    | S <sub>59</sub> | 206/ 6.00 | 0.112 | H-4→L+3(52%) | π(C <sup>^</sup> N + N <sup>^</sup> N)→π*(C <sup>^</sup> N)      | LLCT/ILCT      |     |
|    | T <sub>1</sub>  | 431/ 2.87 | 0.000 | H→L(73%)     | d(Ir)+ π(C <sup>^</sup> N)→π*(N <sup>^</sup> N)                  | MLCT/LLCT      |     |
| 2b | S <sub>1</sub>  | 402/ 3.07 | 0.006 | H→L(98%)     | d(Ir)+π(C <sup>^</sup> N)→π*(N <sup>^</sup> N)                   | MLCT/LLCT      |     |
|    | S <sub>3</sub>  | 320/ 3.86 | 0.078 | H-2→L (81%)  | d(Ir)+π(C <sup>^</sup> N)→π*(N <sup>^</sup> N)                   | MLCT/LLCT      |     |
|    | S <sub>7</sub>  | 280/ 4.42 | 0.192 | H→L+2 (48%)  | d(Ir)+π(C <sup>^</sup> N)→π*(C <sup>^</sup> N)                   | MLCT/LLCT/ILCT |     |
|    | S <sub>58</sub> | 205/ 6.04 | 0.121 | H-5→L+3(50%) | π(C <sup>^</sup> N)→π*(C <sup>^</sup> N)                         | LLCT/ILCT      |     |
|    | T <sub>1</sub>  | 419/ 2.95 | 0.000 | H→L(68%)     | d(Ir)+π(C <sup>^</sup> N)→π*(N <sup>^</sup> N)                   | MLCT/LLCT      |     |
| 2c | S <sub>1</sub>  | 418/ 2.96 | 0.001 | H→L(53%)     | d(Ir)+π(C <sup>^</sup> N)→π*(N <sup>^</sup> N)                   | MLCT/LLCT      |     |
|    |                 |           |       | H→L+1(38%)   | d(Ir)+π(C <sup>^</sup> N)→π*(N <sup>^</sup> N)                   | MLCT/LLCT      |     |
|    | S <sub>3</sub>  | 329/ 3.77 | 0.087 | H-2→L (89%)  | d(Ir)+π(C <sup>^</sup> N+N <sup>^</sup> N)→π*( N <sup>^</sup> N) | MLCT/LLCT/ILCT |     |
|    | S <sub>25</sub> | 242/ 5.10 | 0.139 | H-2→L+2(52%) | d(Ir)+π(C <sup>^</sup> N+N <sup>^</sup> N)→π*( C <sup>^</sup> N) | MLCT/LLCT/ILCT |     |
|    | S <sub>40</sub> | 224/ 5.52 | 0.110 | H-1→L+4(56%) | d(Ir)+π(C <sup>^</sup> N+N <sup>^</sup> N)→π*( C <sup>^</sup> N) | MLCT/LLCT/ILCT |     |
|    | T <sub>1</sub>  | 444/ 2.78 | 0.000 | H→L(51%)     | d(Ir)+π(C <sup>^</sup> N)→π*( N <sup>^</sup> N)                  | MLCT/LLCT      |     |
| 2d | S <sub>1</sub>  | 380/ 3.26 | 0.002 | H→L(97%)     | d(Ir)+π(C <sup>^</sup> N)→π*( N <sup>^</sup> N)                  | MLCT/LLCT      |     |
|    | S <sub>5</sub>  | 303/ 4.08 | 0.113 | H-2→L (60%)  | d(Ir)+π(C <sup>^</sup> N)→π*( N <sup>^</sup> N)                  | MLCT/LLCT      |     |
|    | S <sub>23</sub> | 245/ 5.05 | 0.122 | H→L+4 (55%)  | d(Ir)+π(C <sup>^</sup> N)→π*( C <sup>^</sup> N)                  | MLCT/LLCT/ILCT |     |
|    | S <sub>52</sub> | 211/ 5.85 | 0.099 | H-7→L+2(58%) | π(N <sup>^</sup> N)→π*( C <sup>^</sup> N)                        | LLCT           |     |
|    | S <sub>60</sub> | 205/ 6.04 | 0.119 | H-5→L+3(55%) | π(C <sup>^</sup> N)→π*( C <sup>^</sup> N)                        | LLCT/ILCT      |     |
|    | T <sub>1</sub>  | 409/ 3.03 | 0.000 | H→L(56%)     | d(Ir)+π(C <sup>^</sup> N)→π*( N <sup>^</sup> N)                  | MLCT/LLCT      |     |

<sup>a</sup> Reference 19

**Table S13** Calculated phosphorescent emission wavelength (nm)/energies (eV), of the complexes 1 and 2 in CH<sub>2</sub>Cl<sub>2</sub> media with the TDDFT method at the M062X, M052X, B3LYP and PBE0 level, respectively, together with the experimental values

|  | λ <sub>cal</sub> /E(eV) | λ <sub>cal</sub> /E(eV) | λ <sub>cal</sub> /E(eV) | λ <sub>cal</sub> /E(eV) | Exptl. <sup>a</sup> |
|--|-------------------------|-------------------------|-------------------------|-------------------------|---------------------|
|  | M062X                   | M052X                   | B3LYP                   | PBE0                    |                     |

|   |     |     |     |     |     |
|---|-----|-----|-----|-----|-----|
| 1 | 456 | 474 | 577 | 498 | 460 |
| 2 | 457 | 453 | 556 | 471 | 457 |

<sup>a</sup> Reference 19

**Table S14** Partial molecular orbital composition (%) of 1-1d and 2-2d in the excited states

|    | MO  | Energy/eV | MO composition (%) |     |     | Assignment             |
|----|-----|-----------|--------------------|-----|-----|------------------------|
|    |     |           | Ir                 | C^N | N^N |                        |
| 1  | L   | -2.03     | 3                  | 2   | 96  | $\pi^*(N^N)$           |
|    | H   | -6.02     | 35                 | 63  | 3   | $d(Ir)+\pi(C^N)$       |
| 1a | L   | -2.63     | 4                  | 2   | 94  | $\pi^*(N^N)$           |
|    | H   | -5.96     | 37                 | 49  | 14  | $d(Ir)+\pi(C^N)$       |
| 1b | L   | -2.45     | 3                  | 2   | 96  | $\pi^*(N^N)$           |
|    | H   | -6.13     | 35                 | 58  | 6   | $d(Ir)+\pi(C^N)$       |
| 1c | L   | -2.56     | 4                  | 2   | 95  | $\pi^*(N^N)$           |
|    | H   | -6.19     | 34                 | 64  | 3   | $d(Ir)+\pi(C^N)$       |
|    | H-2 | -6.52     | 3                  | 96  | 1   | $\pi(C^N)$             |
| 1d | L   | -2.25     | 3                  | 2   | 95  | $\pi^*(N^N)$           |
|    | H   | -6.12     | 35                 | 62  | 3   | $d(Ir)+\pi(C^N)$       |
| 2  | L   | -2.01     | 3                  | 2   | 96  | $\pi^*(N^N)$           |
|    | H   | -5.97     | 36                 | 47  | 17  | $d(Ir)+\pi(C^N + N^N)$ |
| 2a | L   | -2.53     | 5                  | 1   | 94  | $\pi^*(N^N)$           |
|    | H   | -5.89     | 36                 | 57  | 7   | $d(Ir)+\pi(C^N)$       |
| 2b | L   | -2.44     | 3                  | 1   | 96  | $\pi^*(N^N)$           |
|    | H   | -6.08     | 38                 | 53  | 8   | $d(Ir)+\pi(C^N)$       |
| 2c | L   | -2.55     | 4                  | 1   | 95  | $\pi^*(N^N)$           |
|    | H   | -6.13     | 36                 | 51  | 13  | $d(Ir)+\pi(C^N)$       |
| 2d | L   | -2.24     | 3                  | 2   | 96  | $\pi^*(N^N)$           |
|    | H   | -6.08     | 38                 | 52  | 11  | $d(Ir)+\pi(C^N)$       |

**Table S15** Cartesian coordinates from the optimized structures of  $S_0$  at PBE0 (B3LYP) /6-31G(d) level for 1

|    | PBE0        |             |             | B3LYP       |             |             |
|----|-------------|-------------|-------------|-------------|-------------|-------------|
| Ir | -0.22227300 | -0.19407300 | 0.09392100  | -0.23533100 | -0.18735800 | 0.09233000  |
| N  | -0.22667500 | -0.53686500 | -1.91375900 | -0.25067900 | -0.56431400 | -1.93495300 |
| N  | -1.16180800 | -1.24369500 | -2.56402100 | -1.20557800 | -1.27776600 | -2.57567000 |
| N  | -0.14928600 | 0.23272700  | 2.09364600  | -0.13728500 | 0.25962400  | 2.11396900  |
| N  | 0.39693600  | 1.36309000  | 2.56527600  | 0.40735000  | 1.41068200  | 2.57274500  |
| N  | 0.28694200  | -2.29968500 | 0.57905600  | 0.31434200  | -2.33383400 | 0.59423600  |
| N  | 1.91094400  | -0.25421800 | -0.00925900 | 1.93085000  | -0.24988800 | -0.01817300 |
| N  | 2.89303200  | 0.58956900  | -0.33514500 | 2.92112500  | 0.60064900  | -0.34816200 |
| N  | 3.78665800  | -1.46153900 | 0.01646300  | 3.81910000  | -1.45465300 | 0.01712400  |
| C  | 0.58144100  | -0.01246500 | -2.83764000 | 0.56315700  | -0.06936700 | -2.87792700 |
| H  | 1.40116700  | 0.62012800  | -2.52713600 | 1.39297900  | 0.55777300  | -2.58728500 |
| C  | 0.16114700  | -0.40329300 | -4.11264000 | 0.13323400  | -0.48192900 | -4.14733100 |
| H  | 0.60299300  | -0.13899100 | -5.06121000 | 0.57708100  | -0.24196300 | -5.10140500 |
| C  | -0.95276800 | -1.19012000 | -3.89454500 | -0.99304200 | -1.25199900 | -3.91314500 |
| H  | -1.60539900 | -1.71713200 | -4.57539400 | -1.65150700 | -1.78367900 | -4.58439700 |
| C  | -2.12639200 | -2.04921300 | -1.83675800 | -2.17954300 | -2.07469200 | -1.83050800 |
| H  | -1.58169100 | -2.89662100 | -1.40157400 | -1.64073300 | -2.92701500 | -1.39903400 |
| H  | -2.81462100 | -2.45286700 | -2.58084200 | -2.87773400 | -2.47134300 | -2.56797000 |
| C  | -2.88456600 | -1.27355400 | -0.79304000 | -2.92571200 | -1.28901100 | -0.77465600 |
| C  | -4.27153000 | -1.41366100 | -0.75780300 | -4.31537400 | -1.43470800 | -0.72128600 |
| C  | -5.08016700 | -0.76151600 | 0.15439300  | -5.12038500 | -0.78610400 | 0.20143500  |
| H  | -6.15545500 | -0.89160000 | 0.15797500  | -6.19458500 | -0.92219400 | 0.21689500  |
| C  | -4.43418900 | 0.07832400  | 1.04956800  | -4.46571900 | 0.05647800  | 1.09218400  |
| C  | -3.06067300 | 0.25635400  | 1.05068400  | -3.08993300 | 0.24130500  | 1.07788800  |
| H  | -2.63887300 | 0.95765000  | 1.76251800  | -2.66614500 | 0.94104400  | 1.78838200  |
| C  | -2.23950700 | -0.42613600 | 0.13731000  | -2.27200700 | -0.43642400 | 0.15187000  |
| C  | -0.59531400 | -0.44967200 | 3.15198900  | -0.55139600 | -0.42310800 | 3.19198400  |
| H  | -1.09832100 | -1.39362000 | 3.00862900  | -1.04195200 | -1.37573600 | 3.06840500  |
| C  | -0.32538800 | 0.25375300  | 4.32734800  | -0.26574600 | 0.29342500  | 4.36049000  |
| H  | -0.56497000 | -0.03283000 | 5.33996600  | -0.48039800 | 0.00836100  | 5.37910300  |
| C  | 0.30791700  | 1.40841900  | 3.90616300  | 0.34439000  | 1.45795500  | 3.92142600  |
| H  | 0.70075800  | 2.25239900  | 4.45404900  | 0.73674900  | 2.30824900  | 4.45948600  |

|   |             |             |             |             |             |             |
|---|-------------|-------------|-------------|-------------|-------------|-------------|
| C | 1.00121000  | 2.34178100  | 1.66820100  | 0.99786500  | 2.39558600  | 1.65545400  |
| H | 1.92205000  | 1.91270400  | 1.25906700  | 1.92305600  | 1.97424200  | 1.25143600  |
| H | 1.26135400  | 3.20244000  | 2.28561200  | 1.24651900  | 3.26475600  | 2.26444200  |
| C | 0.07279800  | 2.73890700  | 0.55827400  | 0.05896900  | 2.77397800  | 0.53759800  |
| C | -0.16743800 | 4.09015800  | 0.32668300  | -0.18445000 | 4.12621300  | 0.29168000  |
| C | -0.97057400 | 4.55318600  | -0.70030300 | -0.99011200 | 4.58329000  | -0.74038800 |
| H | -1.13530000 | 5.61154900  | -0.86116700 | -1.15476000 | 5.64013000  | -0.90955100 |
| C | -1.55322000 | 3.58593500  | -1.50424900 | -1.57333200 | 3.60616100  | -1.53680400 |
| C | -1.35546100 | 2.22885100  | -1.30663900 | -1.37448400 | 2.24757200  | -1.32744300 |
| H | -1.87246900 | 1.53701100  | -1.96346600 | -1.89138000 | 1.55304200  | -1.97942500 |
| C | -0.52741800 | 1.77142800  | -0.27102000 | -0.54380900 | 1.79625000  | -0.28603800 |
| C | -0.56406700 | -3.26428300 | 0.95293000  | -0.51885600 | -3.31908200 | 0.97280200  |
| H | -1.61382000 | -2.98108700 | 0.97177700  | -1.57296800 | -3.05837200 | 0.99863100  |
| C | -0.14689500 | -4.54351000 | 1.28871600  | -0.07558500 | -4.59386400 | 1.30725200  |
| H | -0.87726300 | -5.29000600 | 1.58250500  | -0.79047300 | -5.35396400 | 1.60428200  |
| C | 1.21631000  | -4.83765300 | 1.23509400  | 1.29620500  | -4.86299800 | 1.24737800  |
| H | 1.57706300  | -5.83086300 | 1.48669700  | 1.67678600  | -5.84915200 | 1.49738100  |
| C | 2.10614900  | -3.84311800 | 0.86405700  | 2.16789600  | -3.84995200 | 0.87073300  |
| H | 3.17759400  | -4.00509000 | 0.81412800  | 3.24101700  | -3.99514900 | 0.81602800  |
| C | 1.61055900  | -2.57605200 | 0.54956100  | 1.64886800  | -2.58699200 | 0.55660300  |
| C | 2.46380100  | -1.46394400 | 0.18781300  | 2.48999100  | -1.46235400 | 0.18744700  |
| C | 3.98989100  | -0.17558600 | -0.30255000 | 4.02400500  | -0.16519400 | -0.30906400 |
| C | 5.34841500  | 0.36212900  | -0.61844300 | 5.38567800  | 0.37216000  | -0.62879200 |
| F | -4.86479100 | -2.23285400 | -1.65184700 | -4.92126500 | -2.26322500 | -1.61437200 |
| F | -5.17901900 | 0.74326200  | 1.94442600  | -5.20749100 | 0.72159900  | 2.00406500  |
| F | 0.41399100  | 5.00198400  | 1.13253300  | 0.40108100  | 5.05372900  | 1.09405400  |
| F | -2.34752800 | 3.98761900  | -2.50866200 | -2.37427800 | 4.00024700  | -2.55189900 |
| F | 5.84421500  | -0.18752000 | -1.73967500 | 5.87691500  | -0.16923000 | -1.76711400 |
| F | 6.21878100  | 0.09396100  | 0.36684500  | 6.26882900  | 0.08793500  | 0.35266200  |
| F | 5.31975100  | 1.68710800  | -0.79348200 | 5.36395800  | 1.70766100  | -0.79047200 |

**Table S16** Cartesian coordinates from the optimized structures of S<sub>0</sub> at PBE0 (B3LYP) /6-31G(d) level for 2

|    | PBE0        |             |             | B3LYP       |             |             |
|----|-------------|-------------|-------------|-------------|-------------|-------------|
| Ir | 0.18635100  | -0.43602700 | 0.16884500  | 0.18027300  | -0.43241100 | 0.16894800  |
| N  | -0.18775300 | -1.44118400 | -1.57178300 | -0.20076100 | -1.45296900 | -1.59277900 |
| N  | -1.36116100 | -1.37524400 | -2.21391400 | -1.39045600 | -1.39508300 | -2.23189200 |
| N  | 0.60856700  | 0.55620800  | 1.90587900  | 0.61116900  | 0.57172900  | 1.92817300  |
| N  | -0.05134400 | 1.65434400  | 2.29573400  | -0.04717900 | 1.68712900  | 2.31393100  |
| N  | 0.92264000  | -2.36063000 | 0.96082100  | 0.94659800  | -2.39280200 | 0.98134500  |
| N  | 2.24942200  | -0.37190500 | -0.22320600 | 2.27333600  | -0.38242200 | -0.22766100 |
| N  | 3.09457000  | 0.50347200  | -0.75704300 | 3.12944100  | 0.48936800  | -0.77697000 |
| N  | 4.26860600  | -1.29505300 | -0.02544600 | 4.29522200  | -1.32682100 | -0.05298500 |
| C  | 0.58727100  | -2.27192900 | -2.26982400 | 0.57648900  | -2.27745700 | -2.30603900 |
| H  | 1.60016400  | -2.46253900 | -1.94901200 | 1.59284200  | -2.46364000 | -1.99669200 |
| C  | -0.10625700 | -2.75411100 | -3.38276500 | -0.12384000 | -2.76237100 | -3.41867000 |
| H  | 0.25098400  | -3.43895900 | -4.13655500 | 0.23458800  | -3.44140900 | -4.17712700 |
| C  | -1.34901000 | -2.15605700 | -3.31055100 | -1.37494400 | -2.17547100 | -3.33678800 |
| H  | -2.22044200 | -2.22530600 | -3.94501600 | -2.24817700 | -2.25141600 | -3.96764800 |
| C  | -2.43072200 | -0.52001600 | -1.73281200 | -2.47152600 | -0.54034400 | -1.74376800 |
| H  | -3.24996100 | -0.63833600 | -2.43723900 | -3.29274700 | -0.67374900 | -2.44149700 |
| H  | -2.08338800 | 0.51603900  | -1.78586900 | -2.13497300 | 0.49694800  | -1.81093100 |
| C  | -2.80921300 | -0.85296500 | -0.30940300 | -2.84216500 | -0.86698400 | -0.30848400 |
| C  | -4.13086300 | -1.19772300 | 0.02457300  | -4.16662800 | -1.21662300 | 0.03201300  |
| C  | -4.47252700 | -1.48044900 | 1.34379900  | -4.50420100 | -1.49854600 | 1.35695600  |
| H  | -5.49332900 | -1.73833600 | 1.60011400  | -5.52263300 | -1.75932400 | 1.61719300  |
| C  | -3.49099200 | -1.43653600 | 2.32238600  | -3.51772000 | -1.44990600 | 2.33475100  |
| H  | -3.71295500 | -1.65416200 | 3.36248200  | -3.73563300 | -1.66799500 | 3.37541200  |
| C  | -2.19561300 | -1.10661700 | 1.95595700  | -2.22255000 | -1.11391300 | 1.96185300  |
| C  | -1.78013200 | -0.79409800 | 0.65441600  | -1.80906500 | -0.79966200 | 0.65741700  |
| C  | -5.20416000 | -1.27177600 | -1.02259100 | -5.24927500 | -1.29568600 | -1.01213300 |
| C  | 1.55782900  | 0.33510300  | 2.81569200  | 1.55676500  | 0.34925700  | 2.84955900  |
| H  | 2.22856700  | -0.50296000 | 2.70632300  | 2.22199400  | -0.49348400 | 2.75078200  |
| C  | 1.50663000  | 1.31296600  | 3.81177900  | 1.50786400  | 1.33541400  | 3.84342600  |
| H  | 2.14547300  | 1.40804300  | 4.67637500  | 2.14343400  | 1.42802100  | 4.71070600  |

|   |             |             |             |             |             |             |
|---|-------------|-------------|-------------|-------------|-------------|-------------|
| C | 0.46677000  | 2.14136300  | 3.43829200  | 0.47440900  | 2.17400500  | 3.46252800  |
| H | 0.06405000  | 3.03879700  | 3.88439700  | 0.07845800  | 3.07549700  | 3.90596900  |
| C | -1.13206000 | 2.20131300  | 1.49504400  | -1.13067700 | 2.24226900  | 1.50394100  |
| H | -1.47794000 | 3.08647600  | 2.02246400  | -1.46542400 | 3.13291400  | 2.02686500  |
| H | -1.94906100 | 1.47514100  | 1.48239100  | -1.95362300 | 1.52450300  | 1.50104100  |
| C | -0.66981400 | 2.48519400  | 0.08671000  | -0.66896200 | 2.51655500  | 0.08503500  |
| C | -0.75504500 | 3.78139800  | -0.45317400 | -0.74936000 | 3.81694800  | -0.45962100 |
| C | -0.31433200 | 4.03116600  | -1.74822900 | -0.31283700 | 4.06219300  | -1.76153500 |
| H | -0.38251100 | 5.02929100  | -2.16464100 | -0.37696400 | 5.05924100  | -2.17961000 |
| C | 0.22087100  | 2.99343500  | -2.49544300 | 0.21252900  | 3.01761400  | -2.51204300 |
| H | 0.58754600  | 3.14852300  | -3.50495000 | 0.57360800  | 3.16879100  | -3.52399400 |
| C | 0.30203600  | 1.72936700  | -1.93511400 | 0.28774500  | 1.75136000  | -1.94825900 |
| C | -0.13450800 | 1.40709700  | -0.64269800 | -0.14244600 | 1.43154600  | -0.64992400 |
| C | -1.31698600 | 4.91923100  | 0.34542000  | -1.30268800 | 4.96560000  | 0.33883400  |
| C | 0.19639400  | -3.35238800 | 1.48853000  | 0.23348900  | -3.38713500 | 1.53504100  |
| H | -0.87292400 | -3.18467800 | 1.53505900  | -0.83437200 | -3.22410900 | 1.60508400  |
| C | 0.76229400  | -4.53566700 | 1.93984500  | 0.81451600  | -4.56734800 | 1.98606300  |
| H | 0.12753800  | -5.30773200 | 2.36123300  | 0.19189500  | -5.33875700 | 2.42643600  |
| C | 2.14285500  | -4.70184500 | 1.83875800  | 2.19745100  | -4.72846500 | 1.85915300  |
| H | 2.61679800  | -5.61490800 | 2.18765700  | 2.68217100  | -5.63686400 | 2.20527400  |
| C | 2.90348000  | -3.68937800 | 1.27635200  | 2.94521200  | -3.71335800 | 1.27646000  |
| H | 3.97918000  | -3.76161500 | 1.15583700  | 4.01882100  | -3.78320600 | 1.14123200  |
| C | 2.26291200  | -2.52964600 | 0.83792000  | 2.29213900  | -2.55443300 | 0.83917100  |
| C | 2.96347400  | -1.43003200 | 0.20964100  | 2.98611600  | -1.45181800 | 0.19953600  |
| C | 4.28476500  | -0.09023500 | -0.61822700 | 4.31977600  | -0.11957800 | -0.65260700 |
| C | 5.55404600  | 0.54158900  | -1.09095300 | 5.59596900  | 0.52183800  | -1.10501500 |
| F | -4.91538900 | -2.18445600 | -1.97816500 | -4.96568600 | -2.21834300 | -1.97343900 |
| F | -5.37116800 | -0.09712200 | -1.66524200 | -5.42162700 | -0.11660200 | -1.66533800 |
| F | -6.39488500 | -1.61026600 | -0.51242400 | -6.44636000 | -1.63336900 | -0.49419700 |
| F | -1.28555400 | -1.10273300 | 2.95449700  | -1.30455000 | -1.10863100 | 2.96825200  |
| F | -2.58876200 | 4.68586400  | 0.73980900  | -2.58319200 | 4.74200400  | 0.74349000  |
| F | -0.61299100 | 5.14444800  | 1.47906000  | -0.58939400 | 5.19386400  | 1.47765000  |
| F | -1.32741200 | 6.07064500  | -0.33698000 | -1.31012900 | 6.12309500  | -0.34974100 |
| F | 0.81673800  | 0.76933700  | -2.71896200 | 0.79752100  | 0.78252100  | -2.74214700 |
| F | 5.32977500  | 1.73216800  | -1.65223800 | 5.36483800  | 1.55250100  | -1.93708300 |
| F | 6.41693800  | 0.71974300  | -0.07668900 | 6.31129200  | 0.99825400  | -0.05823000 |
| F | 6.17404700  | -0.23154500 | -1.99815100 | 6.38669200  | -0.36376500 | -1.74774700 |
